# 1 Predictors of vaccination card retention in Tamale Metropolis, Ghana

2 Matthew Y. Konlan<sup>a\*</sup>, Fuseini Mahama<sup>b¶</sup>, Braimah B. Abubakari<sup>b¶</sup>, Paul Konka<sup>c&</sup>, Benedict O.  
3 Appiah<sup>d&</sup>, Maxwell O. Yeboah<sup>e&</sup> Peter G. Kwarteng<sup>f&</sup>, Porbilla O. Apeag<sup>g&</sup>, Michael R. Adjei<sup>h&</sup>,  
4 Martin N. Adokiya<sup>i&</sup>, Oheneba Boadum<sup>j&</sup> Hilarius A. K. Abiwu<sup>a</sup>

5 <sup>a,b,c,d</sup>Northern Regional Health Directorate, Ghana Health Service, Tamale, Ghana, <sup>e</sup>Department of  
6 Nursing, Northern Regional Hospital, Ghana Health Service, Tamale, <sup>f,g</sup>UNICEF, Ghana, Tamale,  
7 <sup>h</sup> WHO Ghana Country Office, Accra, Ghana, <sup>i</sup> Department of Epidemiology, Biostatistics and  
8 Disease Control, School of Public Health, University for Development Studies, Tamale, Ghana, <sup>j</sup>  
9 Department of Advanced Biomedical Education, University of Mississippi Medical Center,  
10 Jackson, MS, USA.

11 \*Corresponding author email: [matthewykonlan@gmail.com](mailto:matthewykonlan@gmail.com)

12 ¶These authors contributed equally to this work

13 &These authors contributed equally to this work

## 14 Abstract

### 15 Background

16 The home-based vaccination card (HBR) is an important health record for determining vaccination  
17 status of children during surveys, particularly in low- and middle-income countries (LMICs).  
18 However, there are limited evidence on the factors that influence its retention in Ghana. We  
19 assessed the predictors of vaccination card retention in Tamale Metropolis, Ghana

### 20 Methods

21 We conducted a cross-sectional study from 21<sup>st</sup> December 2022 to 10<sup>th</sup> January 2023 among  
22 children aged 0-59 months in the Tamale Metropolis. Multi-stage sampling was used to select  
23 caregivers of children aged 0-59 months for enrolment in the study. Data were collected using  
24 validated questionnaire through face-to-face interviews of caregivers. A vaccination card was  
25 retained if it was presented for physical inspection by research assistants. The factors that influence  
26 vaccination card retention were determined in a multivariate logistic regression analysis at  $p < 0.05$ .

### 27 Results

28 A total of 1,566 eligible children were enrolled in this study. Vaccination card retention was  
29 89.5%. Negative predictors of card retention included: being resident in the Nyohini (AOR=0.26;  
30 95% CI=0.15-0.47) and Tamale Central (AOR= 0.52; 95% CI=0.30-0.92) sub-Metro areas, and  
31 children belonging to age group 24-59 months (AOR=0.40; 95% CI=0.23-0.67). On the other  
32 hand, paying for the vaccination card (AOR=5.20; 95% CI=2.98-9.04) was a positive predictor of  
33 vaccination card retention.

### 34 Conclusion

35 In this study, vaccination card retention among children aged 0-59 months was higher than national  
36 estimates. Vaccination card retention was mainly influenced by place of residence, age of child  
37 and mode of acquisition of the card such as out-of-pocket payment. There is need to design and  
38 deliver tailored messages including the importance of vaccination card retention to caregivers of

39 children based on geographic context. Additionally, the vaccination cards should be supplied to  
40 health facilities and made readily accessible to caregivers to prevent out-of-pocket payment.

41 Keywords: Home-based vaccination cards, retention, Tamale Metropolis, Ghana

42

## 43 **Introduction**

44 Routine childhood vaccination is one of the most successful public health interventions, averting  
45 four million deaths every year [1]. Aside protection against preventable diseases, vaccination  
46 brings children and their families into contact with health systems, providing an opportunity for  
47 delivery of other health services [1]. Routine immunization reduces vaccine-preventable disease  
48 incidence [2], and antimicrobial use [3], resistance [4] and associated deaths [5].

49 In low- and middle-income countries (LMICs), home-based vaccination cards (HBRs) are the  
50 primary means for assessing vaccination status of children during surveys [6,7]. Additionally,  
51 HBRs serve as a medium for the delivery of reminder strategies on when to bring a child for future  
52 vaccinations [8], promoting adherence to routine childhood vaccination uptake [9]. However, they  
53 are less valued, retained and used by caregivers to support healthcare decisions [10].

54 In Ghana, vaccination data are collected during service delivery through vaccination registers and  
55 individual HBRs. The vaccination registers are paper-based records kept in the facility and used  
56 for estimating administrative coverages. The HBRs are kept by caregivers of children for follow  
57 ups on the vaccination schedule and used as reference source for vaccination coverage surveys.

58 Current available evidence revealed a national vaccination card retention rate of 78.5% [11], a  
59 decline from 2014 rate of 80% [12]. Understanding factors that influence vaccination card  
60 retention can help in the design and delivery of tailored messages to improve retention. However,  
61 studies on predictors of vaccination card retention are limited in Ghana. To fill this gap, and further  
62 understand factors for non-retention of vaccination cards among caregivers, this study assessed  
63 predictors of vaccination card retention among children aged 0-59 months in Tamale Metropolis,  
64 Ghana.

65

## 66 **Materials and Methods**

### 67 **Study design**

68 This was a community-based analytical cross-sectional study conducted from 21<sup>st</sup> December 2022  
69 to 10<sup>th</sup> January 2023 among children aged 0-59 months in the Tamale Metropolis. This study was  
70 carved out of a larger community-based cross-sectional pre- and post-COVID-19 pandemic cluster  
71 design survey of children under five years in Tamale Metropolis.

### 72 **Study area**

73 This study was conducted in Tamale, which doubles as the administrative capital and district  
74 capital of the Northern Region and Tamale Metropolis respectively. According to the 2021  
75 Population and Housing Census, the Metropolis has a population of 374,744: 185,051 males and  
76 189,693 females [13]. The Metropolis is divided into four (4) health sub-Metros: Vittin, Bilpela,  
77 Nyohini and Tamale Central, with 77 health facilities including Community-based Health  
78 Planning and Services (CHPS), which render a range of services including vaccination.

### 79 **Study population**

80 Children aged 0-59 months and their caregivers constituted the study population. Even though  
81 Ghana's vaccination schedule targets children from 0-18 months, we included all children less  
82 than five (5) years to compare findings of children still in the vaccination schedule and those who  
83 should have completed their schedule.

#### 84 **Sample size calculation**

85 Based on the WHO survey sample size calculator version 2 [14], we estimated a sample of 1, 512  
86 children aged 0-59 months using the following assumptions: 95% coverage for all basic  
87 immunizations (Northern Regional target), a precision of  $\pm 5\%$  (95% confidence interval), a design  
88 effect (DEFF) of 2, assumption of a minimum of 5 children per cluster, an intra-cluster correlation  
89 coefficient (ICC) of  $1/3$ , assuming that 10% of eligible respondents will not be available or will  
90 decline the survey and that we would need to visit 4 households to identify an eligible child.

#### 91 **Selection of respondents**

92 Multi-stage sampling was used to select respondents. In stage one, all 63 clusters were purposively  
93 selected from the four (4) sub-Metros in Tamale. Clusters were made up of demarcated CHPS  
94 zones in the study area, and a list of all clusters and the communities under each cluster was  
95 obtained from the Tamale Metro Health Directorate. In stage two, a list of all communities in each  
96 cluster was generated and coded. Sixty-three (63) communities, one from each cluster were then  
97 selected using simple random sampling. In stage three, the initial house was selected using the  
98 central pen-spinning technique. Subsequently, houses were selected using an interval of three and  
99 two in urban and peri-urban localities respectively. In stage four, simple random sampling was  
100 used to select eligible children.

#### 101 *Eligibility criteria*

102 All caregivers of children aged 0-59 months were included in this study. Caregivers of children  
103 above 59 months, those who had never received a vaccination card, and those who declined were  
104 excluded.

#### 105 **Data collection**

106 Data were collected using validated questionnaire by the WHO for assessing routine immunization  
107 coverage [15]. The questionnaire consisted of socio-demographic variables of eligible caregiver-  
108 child pairs, vaccination coverage using card and caregiver recall of vaccination questions.  
109 Questionnaire was deployed using the latest android version (v2021.2.4) of KoboCollect App [16]  
110 in Samsung mobile tablets. Trained research assistants collected data through face-to-face  
111 interviews with respondents. During the survey, caregivers were requested to present vaccination  
112 cards to confirm retention.

#### 113 **Quality assurance**

114 Research assistants were given a day's training on survey objectives, methods and how to ask  
115 questions to elicit appropriate responses. Tools were pretested and modified by investigators to  
116 enhance clarity. Biodata and vaccination record pages of eligible children were taken to confirm  
117 card retention. Submitted questionnaires were checked for correctness and completeness.

#### 118 **Operational definitions**

119 A vaccination card was defined as any document given by a healthcare provider stating the  
120 vaccination status of an eligible child [17].

121 A caregiver is defined as an individual who provides physical and psychological care for the child.

122 Card was retained if a document was seen and verified by research assistants as proof of  
123 vaccination status of eligible child.

124

## 125 **Data analysis**

126 Data were exported from KoboCollect into excel for cleaning before being imported in Stata  
127 Version 15.1 (Stata Corp (2017) Stata Statistical Software: Release 15. College Station, TX.) for  
128 analysis. Card retention was the outcome variable, which was determined through correct “Yes”/  
129 “No” responses to the physical inspection of a vaccination card presented for review of research  
130 assistants by caregivers as proof of vaccination status. The exposure variables were sub-Metro,  
131 sex of child, age of child, place of delivery, sex of caregiver, age of caregiver, employment status  
132 of caregiver, and educational status of respondent, relationship of child to respondent and whether  
133 card was paid for (out-of-pocket).

134 The predictors of vaccination card retention was assessed through a logistic regression model. The  
135 factors that showed significant association in the univariate regression analysis at  $p < 0.05$  were  
136 fitted in the multivariate regression analysis.

## 137 **Ethical Approval**

138 This study received approval from the Navrongo Health Research Center Institutional Review  
139 Board (Approval ID: NHRCIRB495). Verbal consent was obtained from caregivers of eligible  
140 children before enrolment in the study. Study objectives, approach and rights of respondents were  
141 explained in detail and clarifying questions addressed by the research assistants.

## 142 **Results**

### 143 **Sample description**

144 Though our estimated sample size was 1512, we enrolled 1577 eligible children. However, only  
145 1,566 were included in the data analysis after cleaning.

### 146 **Vaccination card retention**

147 Of the 1,566 sample, 89.5% presented vaccination cards as proof of vaccination status. Of the  
148 remaining 164, misplaced (63.4%) was the predominantly reportedly reason for non-retention,  
149 followed by other reasons such as not knowing where it is being kept during the study or feeling  
150 lazy to retrieve card (28.1%), and destroyed (8.5%).

151 In a multivariate regression analysis, sub-Metro type, age of child and whether card was paid for  
152 or not were significant predictors of vaccination card retention. Living in Tamale Central (AOR=  
153 0.52; 95% CI=0.30-0.92) or Nyohini (AOR= 0.26; 95% CI=0.15-0.47) sub-Metros was negatively  
154 associated with card retention. Similarly, compared to children aged 0-11 months, those aged 24-  
155 59 months had lower odds (AOR=0.40; 95% CI=0.23-0.67) of retaining their vaccination cards.  
156 However, caregivers who paid for the card had higher odds (AOR=5.20; 95% CI=2.98-9.04) of  
157 retention (Table 1).

158

159

160

161

162

163

164

Table 1: Factors associated with vaccination card retention in Tamale Metropolis, Ghana

| Variable                                   | Retention (n=1,566) |     | COR (95% CI)      | AOR (95% CI)      |
|--------------------------------------------|---------------------|-----|-------------------|-------------------|
|                                            | Yes                 | No  |                   |                   |
| <b>Sub-Metro type</b>                      |                     |     |                   |                   |
| Bilpela                                    | 385                 | 34  | Reference         | Reference         |
| Nyohini                                    | 311                 | 44  | 0.62(0.39-1.0)    | 0.26(0.15-0.47) * |
| Tamale Central                             | 370                 | 55  | 0.59(0.38-0.93) * | 0.52(0.30-0.92) * |
| Vittin                                     | 336                 | 31  | 0.96(0.58-1.59)   | 0.93(0.48-1.83)   |
| <b>Sex of child</b>                        |                     |     |                   |                   |
| Female                                     | 662                 | 80  | Reference         |                   |
| Male                                       | 740                 | 84  | 1.06(0.77-1.47)   |                   |
| <b>Age of child(n=1532)</b>                |                     |     |                   |                   |
| 0-11 months                                | 378                 | 22  | Reference         | Reference         |
| 23-23 months                               | 378                 | 28  | 0.79(0.44-1.40)   | 0.70(0.28-1.38)   |
| 24-59 months                               | 646                 | 80  | 0.47(0.29-0.77) * | 0.40(0.23-0.67) * |
| <b>Place of delivery(n=1564)</b>           |                     |     |                   |                   |
| Home/TBA                                   | 95                  | 6   | Reference         |                   |
| Privately owned facility                   | 45                  | 2   | 1.42(0.28-7.32)   |                   |
| Publicly owned facility                    | 1260                | 156 | 0.51(0.22-1.18)   |                   |
| <b>Age of respondent</b>                   |                     |     |                   |                   |
| <30 years                                  | 952                 | 102 | Reference         |                   |
| ≥30 years                                  | 450                 | 62  | 0.78(0.56-1.09)   |                   |
| <b>Sex of respondent</b>                   |                     |     |                   |                   |
| Female                                     | 1328                | 149 | Reference         | Reference         |
| Male                                       | 74                  | 15  | 0.55(0.31-0.99) * | 3.67(0.50-26.83)  |
| <b>Educational status of respondent</b>    |                     |     |                   |                   |
| None                                       | 316                 | 40  | Reference         |                   |
| Primary                                    | 702                 | 70  | 1.27(0.84-1.91)   |                   |
| Secondary                                  | 281                 | 42  | 0.85(0.53-1.34)   |                   |
| Tertiary                                   | 103                 | 12  | 1.09(0.55-2.15)   |                   |
| <b>Employment status of respondent</b>     |                     |     |                   |                   |
| Employed                                   | 420                 | 53  | Reference         |                   |
| Unemployed                                 | 982                 | 111 | 1.12(0.79-1.58)   |                   |
| <b>Relationship of child to respondent</b> |                     |     |                   |                   |
| Mother                                     | 1336                | 145 | Reference         | Reference         |
| Father                                     | 54                  | 12  | 0.49(0.26-0.93) * | 0.39(0.05-2.89)   |
| Other <sup>b</sup>                         | 12                  | 7   | 0.19(0.07-0.48) * | 0.25(0.05-1.29)   |
| <b>Pay for card (1,539)</b>                |                     |     |                   |                   |
| No                                         | 829                 | 132 | Reference         | Reference         |
| Yes                                        | 554                 | 24  | 3.68(2.34-5.75) * | 5.20(2.98-9.04) * |

<sup>b</sup>=auntie/sibling; \*p value<0.05; COR=Crude Odds Ratio; AOR=Adjusted Odds Ratio; CI=Confidence Interval; TBA=Traditional Birth Attendant

165 **Discussion**

166 Our study shows a high (89.5%) vaccination card retention rate. This is similar to nationally  
 167 reported rate of 80% in 2014 [12] and 78.5% in 2022 [11]. A study in Nepal [18] reported similar

168 card retention rate of 82.2%. In contrast, lower rates of retention have been reported by other  
169 studies in Senegal (73.7%) [19], Uganda (66.0%) [20], Cameroon (29.9%) [21], Zimbabwe (68%)  
170 [22], Nigeria (63.3%, 32.6%) [23,24] and Pakistan (66.2%).

171 Residing in Nyohini or Tamale Central sub-Metros was negatively associated with vaccination  
172 card retention. This may be partly explained by the fact that caregivers in these sub-Metros may  
173 have low awareness level on the importance of keeping the vaccination card, as this may have not  
174 been emphasized by healthcare providers who issued cards.

175 Similarly, children aged 24-59 months had reduced odds of having their cards retained. Studies in  
176 Senegal [19], Uganda [20] and Pakistan [26] have reported similar findings that older children  
177 were less likely to retain vaccination cards. The possible reason for this is that caregivers don't  
178 understand the importance of keeping the card after completing the vaccination schedule.

179 Caregivers who paid for the vaccination card had increased odds of retaining it. The possible  
180 reason is that caregivers who pay for the vaccination cards recognize its value and are more likely  
181 to take good care of them. On the other hand, they may want to avoid paying for replacement in  
182 event of a loss. However, sale of vaccination cards is against the vaccination policy in Ghana, even  
183 in times of shortages, when health facilities print copies to support service delivery. It is expected  
184 that the cost of making copies of the vaccination card be borne by the health facilities without  
185 transfer to service users.

### 186 **Strengths and limitations of the study**

187 This study used a relatively large sample; therefore, the findings can be interpreted in wider  
188 context. Additionally, the study used an objective measure through physical inspection to assess  
189 card retention. However, findings of this study should be interpreted in the light of the fact that as  
190 cross-sectional study, it difficult to establish causality between exposures and vaccination card  
191 retention. Additionally, the failure of some of the caregivers to present cards for inspection does  
192 not mean that the children do not have them.

### 193 **Conclusions**

194 Our study found high vaccination card retention rate. Sub-Metro, age of child and payment for  
195 card were significantly associated with vaccination card retention.

196 Health care providers in the Nyohini and Tamale Central sub-Metros should endeavor to intensify  
197 education of caregivers on the importance vaccination cards and the need for safe keeping.  
198 Additionally, caregivers of older children should be educated about the importance of keeping  
199 cards after the child has completed vaccination schedule. Given that payment for card improves  
200 retention, vaccination cards should be supplied to health facilities and made readily accessible to  
201 caregivers to prevent out-of-pocket payment.

202

### 203 **Acknowledgement**

204 We thank the caregivers of children aged 0-59 months in the study area and the field officers for  
205 their dedicated service during fieldwork. We acknowledge funding support from the Northern  
206 Regional Health Directorate and the Sabin Vaccine Institute Boost Community.

207

### 208 **Data Availability statement**

209 All relevant data are included in the manuscript and will be provided on reasonable request.

210

### 211 **Funding**

212 The authors received no specific funding for this work.

213

### 214 **Conflict of interest**

215 The authors declare that no competing interests exist.

216

### 217 **Authors' contributions**

218 Conceptualization: Matthew Yosah Konlan, Dr. Hilarius Asiwome Kosi Abiwu, Fuseini Mahama,  
219 Dr. Braimah Baba Abubakari.  
220 Data curation: Matthew Yosah Konlan, Dr. Hilarius Asiwome Kosi Abiwu.  
221 Formal analysis: Matthew Yosah Konlan.  
222 Methodology: Matthew Yosah Konlan, Dr. Hilarius Asiwome Kosi Abiwu, Dr. Braimah Baba  
223 Abubakari, Fuseini Mahama, Paul Konka, Benedict Ofori Appiah, Maxwell Oduro Yeboah, Dr.  
224 Peter Gyamfi Kwarteng, Porbilla Ofosu Dr. Oheneba Boadum, Dr. Michael Rockson Adjei,  
225 Professor Martin Nyaaba Adokiya.  
226 Supervision: Matthew Yosah Konlan, Fuseini Mahama, Dr. Hilarius Asiwome Kosi Abiwu, Dr.  
227 Braimah Baba Abubakari.  
228 Writing – original draft: Matthew Yosah Konlan.  
229 Writing – review & editing: Dr. Hilarius Asiwome Kosi Abiwu, Dr. Braimah Baba Abubakari,  
230 Fuseini Mahama, Paul Konka, Benedict Ofori Appiah, Maxwell Oduro Yeboah, Dr. Peter Gyamfi  
231 Kwarteng, Porbilla Ofosu Apea, Dr. Oheneba Boadum, Dr. Michael Rockson Adjei, Professor  
232 Martin Nyaaba Adokiya  
233

### 234 **List of abbreviations**

235 AOR=adjusted odds ratio; CHPS= community-based health planning and services; CI= confidence  
236 interval; COR=crude odds ratio; DEFF=design effect; HBR=home-based vaccination cards;  
237 ICC=intra-cluster coefficient; LMICs= low- and middle-income countries; TBA=traditional birth  
238 attendant  
239

### 240 **References**

- 241 [1] World Health Organization. Overview of immunization in the African Region. WHO Web  
242 Page 2023. <https://www.afro.who.int/health-topics/immunization> (accessed August 15,  
243 2023).
- 244 [2] Talbird SE, Carrico J, La EM, Carias C, Marshall GS, Roberts CS, et al. Impact of  
245 Routine Childhood Immunization in Reducing Vaccine-Preventable Diseases in the  
246 United States. *Pediatrics* 2022;150. <https://doi.org/10.1542/peds.2021-056013>.
- 247 [3] Buckley BS, Henschke N, Bergman H, Skidmore B, Klemm EJ, Villanueva G, et al.  
248 Impact of vaccination on antibiotic usage: a systematic review and meta-analysis. *Clinical*  
249 *Microbiology and Infection* 2019; 25:1213–25. <https://doi.org/10.1016/j.cmi.2019.06.030>.
- 250 [4] Lewnard JA, Lo NC, Arinaminpathy N, Frost I, Laxminarayan R. Childhood vaccines and  
251 antibiotic use in low- and middle-income countries. *Nature* 2020; 581:94–9.  
252 <https://doi.org/10.1038/s41586-020-2238-4>.
- 253 [5] Kim C, Holm M, Frost I, Hasso-Agopsowicz M, Abbas K. Global and regional burden of  
254 attributable and associated bacterial antimicrobial resistance avertable by vaccination:  
255 modelling study. *BMJ Glob Health* 2023;8: e011341. <https://doi.org/10.1136/bmjgh-2022-011341>.
- 257 [6] Dansereau E, Brown D, Stashko L, Danovaro-Holliday MC. A systematic review of the  
258 agreement of recall, home-based records, facility records, BCG scar, and serology for  
259 ascertaining vaccination status in low and middle-income countries. *Gates Open Res*  
260 2020; 3:923. <https://doi.org/10.12688/gatesopenres.12916.2>.

- 261 [7] Miles M, Ryman TK, Dietz V, Zell E, Luman ET. Validity of vaccination cards and  
262 parental recall to estimate vaccination coverage: A systematic review of the literature.  
263 *Vaccine* 2013; 31:1560–8. <https://doi.org/10.1016/j.vaccine.2012.10.089>.
- 264 [8] Wallace AS, Peetosutan K, Untung A, Ricardo M, Yosephine P, Wannemuehler K, et al.  
265 Home-based records, and vaccination appointment stickers as parental reminders to  
266 reduce vaccination dropout in Indonesia: A cluster-randomized controlled trial. *Vaccine*  
267 2019; 37:6814–23. <https://doi.org/10.1016/j.vaccine.2019.09.040>.
- 268 [9] Chutiyami M, Wyver S, Amin J. Are Parent-Held Child Health Records a Valuable Health  
269 Intervention? A Systematic Review and Meta-Analysis. *Int J Environ Res Public Health*  
270 2019; 16:220. <https://doi.org/10.3390/ijerph16020220>.
- 271 [10] JSI. Improving the Availability and Use of Home-Based Records: Challenges and Lessons  
272 Learned. EPI Managers Meeting for East and South African Region in March 2018. Talks  
273 about the Zimbabwe and Kenyan experiences with home-based records, TechNet-21;  
274 2018.
- 275 [11] Ghana Statistical Service. Ghana Demographic and Health Survey 2022 Key Indicators  
276 Report. 2022.
- 277 [12] Ghana Statistical Service. Ghana Demographic Health Survey. Ghana Statistical Service  
278 2015:530.
- 279 [13] Ghana Statistical Service. Ghana 2021 Population and Housing Census. 2022.
- 280 [14] Dana Thompson. WHO sample size calculator for cluster surveys version 2 2017.
- 281 [15] WHO. World Health Organization Vaccination Coverage Cluster Surveys: Reference  
282 Manual. 2018.
- 283 [16] KoBoToolbox. Simple, robust and powerful tools for data collection 2021.  
284 <https://www.kobotoolbox.org> (accessed August 26, 2023).
- 285 [17] Yakum MN, Funwie AD, Ajong AB, Tsafack M, Ze LEE, Ekukole ESR, et al. Factors  
286 associated with routine vaccination card retention among children aged 0–59 months in  
287 Yaounde-Cameroon: A cross-sectional survey. *PLoS One* 2022;17: e0273515.  
288 <https://doi.org/10.1371/journal.pone.0273515>.
- 289 [18] Paudel KP, Bajracharya DC, Karki K, KC A. Factors determining availability, utilization  
290 and retention of child health card in Western Nepal 2016.
- 291 [19] Seror V, Cortaredona S, Ly EY, Ndiaye S, Gaye I, Fall M, et al. Vaccination card  
292 availability and childhood immunization in Senegal. *BMC Public Health* 2020; 20:658.  
293 <https://doi.org/10.1186/s12889-020-08792-5>.
- 294 [20] Griffith BC, Cusick SE, Searle KM, Negoescu DM, Basta NE, Banura C. Does  
295 mothers' and caregivers' access to information on their child's vaccination card impact the  
296 timing of their child's measles vaccination in Uganda? *BMC Public Health* 2022; 22:834.  
297 <https://doi.org/10.1186/s12889-022-13113-z>.
- 298 [21] Ateudjieu J, Yakum MN, Goura AP, Tembei AM, Ingrid DK, Bitá'a Landry B, et al. EPI  
299 immunization coverage, timeliness, and dropout rate among children in a West Cameroon



- 300 health district: a cross sectional study. BMC Public Health 2020; 20:228.  
301 <https://doi.org/10.1186/s12889-020-8340-6>.
- 302 [22] Kriss JL, Goodson J, Machekanyanga Z, Machekanyanga Z, Daniel F, Masresha B, et al.  
303 Vaccine receipt and vaccine card availability among children of the apostolic faith:  
304 analysis from the 2010-2011 Zimbabwe demographic and health survey. Pan African  
305 Medical Journal 2016;24. <https://doi.org/10.11604/pamj.2016.24.47.8663>.
- 306 [23] Adedire EB, Ajayi I, Fawole OI, Ajumobi O, Kasasa S, Wasswa P, et al. Immunisation  
307 coverage and its determinants among children aged 12-23 months in Atakumosa-west  
308 district, Osun State Nigeria: a cross-sectional study. BMC Public Health 2016; 16:905.  
309 <https://doi.org/10.1186/s12889-016-3531-x>.
- 310 [24] Akwataghibe NN, Ogunsola EA, Broerse JEW, Popoola OA, Agbo AI, Dieleman MA.  
311 Exploring Factors Influencing Immunization Utilization in Nigeria—A Mixed Methods  
312 Study. Front Public Health 2019;7. <https://doi.org/10.3389/fpubh.2019.00392>.
- 313 [25] Hussain I, Khan A, Rhoda DA, Ahmed I, Umer M, Ansari U, et al. Routine Immunization  
314 Coverage and Immunization Card Retention in Pakistan: Results from a Cross-sectional  
315 National Survey. Pediatr Infect Dis J 2023; 42:260–70.  
316 <https://doi.org/10.1097/INF.0000000000003804>.
- 317 [26] Sheikh SS, Ali SA. Predictors of vaccination card retention in children 12-59 months old  
318 in Karachi, Pakistan. Oman Med J 2014; 29:190.
- 319
